# Supplementary material for: PCR amplification of the erm(41) gene can be used to predict the sensitivity of Mycobacterium abscessus complex strains to clarithromycin
Source: PubMed Central journal article supplement — Exp Ther Med. 2019 Dec 5;19(2):945–55. doi: 10.3892/etm.2019.8289 (PMC6966227; doi:10.3892/etm.2019.8289), 2019-12-05

Figure S1. MALDI-TOF gel views for *M. fortuitum*, *M. abscessus* subsp. *abscessus* and *M. abscessus* subsp. *massiliense* (4,000-12,000  $m/z$ ). MALDI-TOF; Matrix-assisted laser desorption ionization-time of flight mass spectrometry.

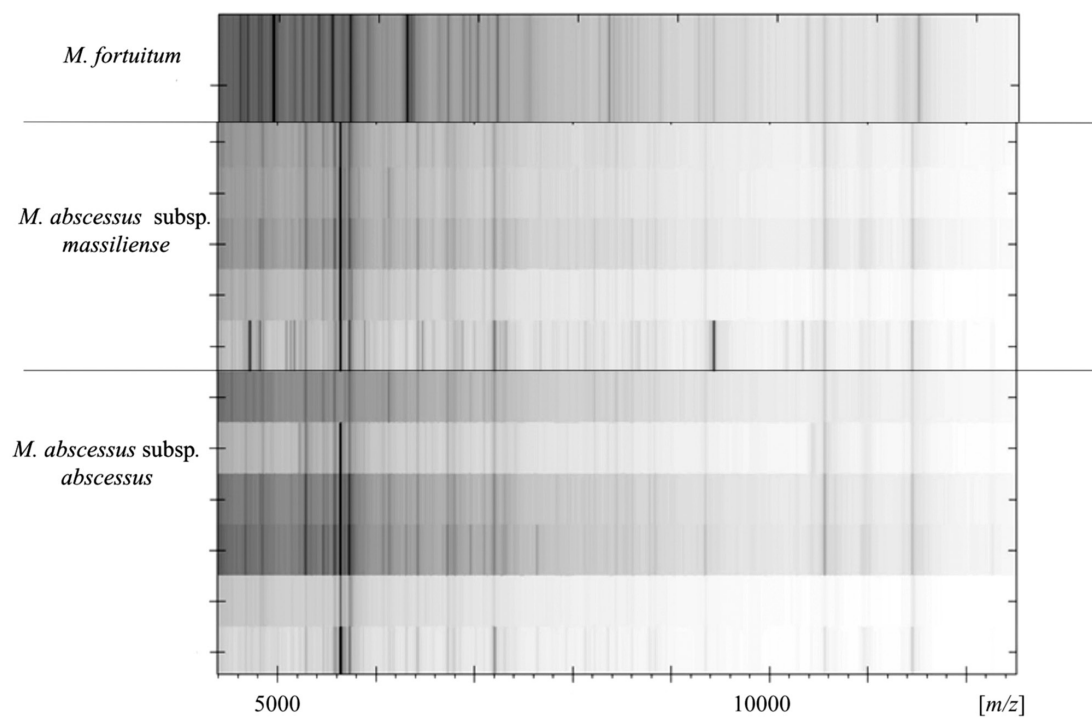

Supplement: Supplementary_Data.pdf [file Supplementary_Data.pdf]
